# Supplementary material
Source: MDPI journal article supplement (https://www.mdpi.com/2311-5637/8/9/461)
Supplement: s1 [file s1]

## Article

# In Vitro Fermentation and Degradation Characteristics of Rosemary Extract in Total Mixed Ration of Lactating Dairy Cows

Fanlin Kong, Shuo Wang, Zhijun Cao, Yajing Wang, Shengli Li and Wei Wang \*

Beijing Engineering Technology Research Center of Raw Milk Quality and Safety Control, The State Key Laboratory of Animal Nutrition, Department of Animal Nutrition and Feed Science, College of Animal Science and Technology, China Agricultural University, No. 2 Yuanmingyuan West Road, Haidian District, Beijing 100094, China

\* Correspondence: wei.wang@cau.edu.cn; Tel.: +86-010-62733789

**Supplementary Table S1.** Ingredients and nutrient compositions of basic diet.

| Items                                          | Value |
|------------------------------------------------|-------|
| Diet ingredients, %                            |       |
| Corn silage                                    | 55.80 |
| Oat hay                                        | 2.50  |
| Alfalfa                                        | 6.30  |
| Distillers dried grains with soluble           | 1.60  |
| Flaked corn                                    | 5.20  |
| Soybean husk                                   | 1.90  |
| Cottonseed                                     | 1.60  |
| Fatty powder                                   | 1.27  |
| Extruded soybean                               | 1.88  |
| Corn                                           | 6.22  |
| Bran                                           | 2.47  |
| Soybean meal                                   | 6.77  |
| Rapeseed meal                                  | 0.94  |
| Cottonseed meal                                | 2.51  |
| Pre-mix <sup>1</sup>                           | 3.14  |
| Nutrient level, of dry matter                  |       |
| Net energy of lactation <sup>2</sup> , Mcal/kg | 1.67  |
| Crude protein, %                               | 16.60 |
| Ether extract, %                               | 5.77  |
| Neutral detergent fiber, %                     | 33.20 |
| Acid detergent fiber, %                        | 19.20 |
| Ash, %                                         | 8.71  |
| Ca, %                                          | 0.96  |
| P, %                                           | 0.45  |

<sup>1</sup> Formulated to provide (per kg of dry matter): 250,000 IU of vitamin A, 50,000 IU of vitamin D<sub>3</sub>, 1100 IU of vitamin E, 250 mg of Cu, 500 mg of Mn, 1,000 mg of Zn, 20 mg of Se, 40 mg of I, 24 mg of Co

<sup>2</sup> Net energy for lactation was estimated using NRC (2001) model.
