# Supplementary material
Source: MDPI journal article supplement (https://www.mdpi.com/2311-5637/8/9/461)

## Article

# In Vitro Fermentation and Degradation Characteristics of Rosemary Extract in Total Mixed Ration of Lactating Dairy Cows

Fanlin Kong, Shuo Wang, Zhijun Cao, Yajing Wang, Shengli Li and Wei Wang \*

Beijing Engineering Technology Research Center of Raw Milk Quality and Safety Control, The State Key Laboratory of Animal Nutrition, Department of Animal Nutrition and Feed Science, College of Animal Science and Technology, China Agricultural University, No. 2 Yuanmingyuan West Road, Haidian District, Beijing 100094, China

\* Correspondence: wei.wang@cau.edu.cn; Tel.: +86-010-62733789

**Supplementary Figure S1.** UPLC-MS/MS chromatograms of rosemary extract.

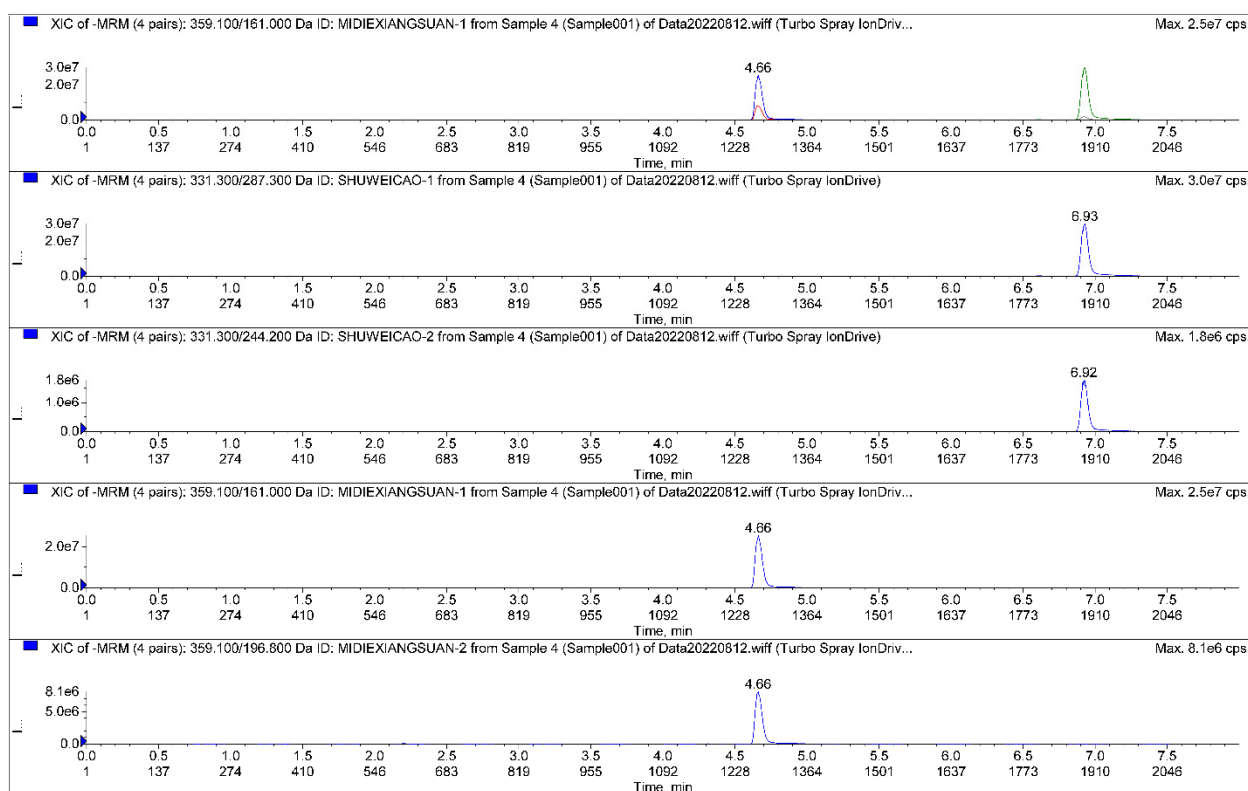

Supplement: s1 [file s1]
